# Supplementary material for: Geomechanical modelling of sinkhole development using distinct elements: model verification for a single void space and application to the Dead Sea area
Source: Copernicus journal article supplement (doi:10.5194/se-9-1341-2018), 2018-11-23
Supplement: Supplementary file 1 [file se-9-1341-2018-supplement.zip]

Archive with 7 entries (7 files):
- se-9-1341-2018-supplement-title-page.pdf
- Sinkhole_Mud.avi
- Sinkhole-SaltMud.avi
- Sinkhole-AlluvMud.avi
- Sinkhole-MudSalt.avi
- Sinkhole-Alluv.avi
- Sinkhole-Salt.avi
