# Supplementary material for: Geomechanical modelling of sinkhole development using distinct elements: model verification for a single void space and application to the Dead Sea area
Source: Copernicus journal article supplement (doi:10.5194/se-9-1341-2018), 2018-11-23
Supplement: Supplementary file 1 [file se-9-1341-2018-supplement.zip › se-9-1341-2018-supplement-title-page.pdf]

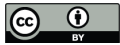

## *Supplement of*

# **Geomechanical modelling of sinkhole development using distinct elements: model verification for a single void space and application to the Dead Sea area**

**Djamil Al-Halbouni et al.**

*Correspondence to:* Djamil Al-Halbouni ([halbouni@gfz-potsdam.de](mailto:halbouni@gfz-potsdam.de))

- [se-9-1341-2018-supplement-title-page.pdf](#)
- [Sinkhole-Alluv.avi](#)
- [Sinkhole-AlluvMud.avi](#)
- [Sinkhole-MudSalt.avi](#)
- [Sinkhole-Salt.avi](#)
- [Sinkhole-SaltMud.avi](#)
- [Sinkhole\\_Mud.avi](#)

The copyright of individual parts of the supplement might differ from the CC BY 4.0 License.
